# Supplementary material for: Precursor engineering for soft selective synthesis of phase pure metal-rich digenite (Cu9S5) and djurleite (Cu31S16) nanocrystals and investigation of their photo-switching characteristics
Source: Royal Society of Chemistry journal article supplement (doi:10.1039/d4ra04524f), 2024-01-01
Supplement: d4ra04524f1.pdf [file d4ra04524f1.pdf]

## **Precursor Engineering for Soft Selective Synthesis of Phase Pure Metal-Rich Digenite (Cu<sub>9</sub>S<sub>5</sub>) and Djurleite (Cu<sub>31</sub>S<sub>16</sub>) Nanocrystals and Investigation of Their Photo-Switching Characteristics**

Suraj Peerappa Yadav<sup>a, #</sup>, Gourab Karmakar<sup>b, #</sup>, Alpa Y. Shah<sup>b</sup>, Bal Govind Vats,<sup>c</sup> Ankita Pathak,<sup>d</sup> Adish Tyagi<sup>b, \*</sup>, Rohit Singh Chauhan<sup>a, \*</sup>, Vishal Singh<sup>e</sup>

<sup>a</sup>*Department of Chemistry, K. J. Somaiya College of Science and Commerce, Vidyavihar, Mumbai, 400077, India.*

<sup>b</sup>*Chemistry Division, Bhabha Atomic Research Centre, Trombay, Mumbai, 400085, India.*

<sup>c</sup>*Fuel Chemistry Division, Bhabha Atomic Research Centre, Trombay, Mumbai, 400085, India.*

<sup>d</sup>*Technical Physics Division, Bhabha Atomic Research Centre, Trombay, Mumbai- 400085, India.*

<sup>e</sup>*Materials Science Division, Bhabha Atomic Research Centre, Trombay, Mumbai- 400085, India.*

<sup>#</sup>Authors contributed equally

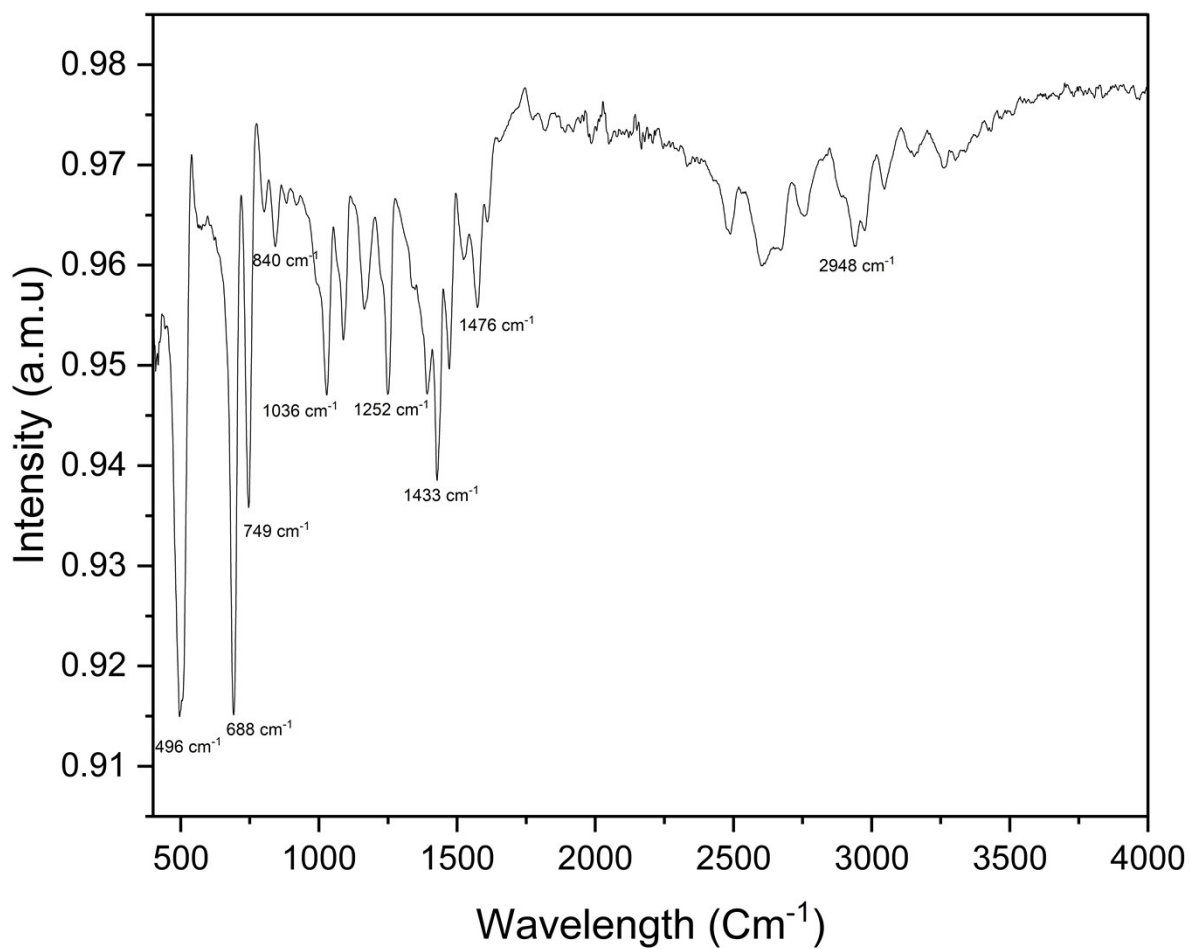

**Fig. S1.** IR spectra of CuCl(dmpymSH)(PPh<sub>3</sub>)<sub>2</sub> (**1**)

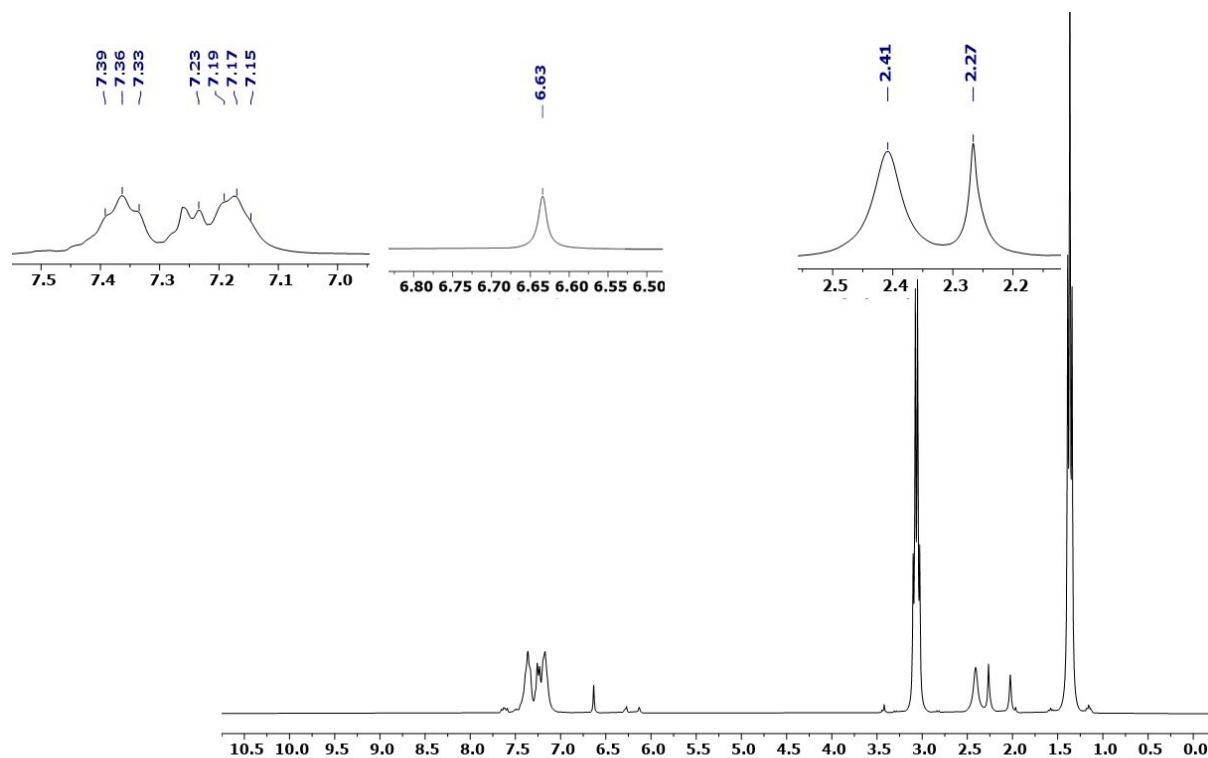

**Fig. S2.**  $^1\text{H}$  NMR spectra of  $\text{CuCl}(\text{dmpymSH})(\text{PPh}_3)_2$  (**1**)

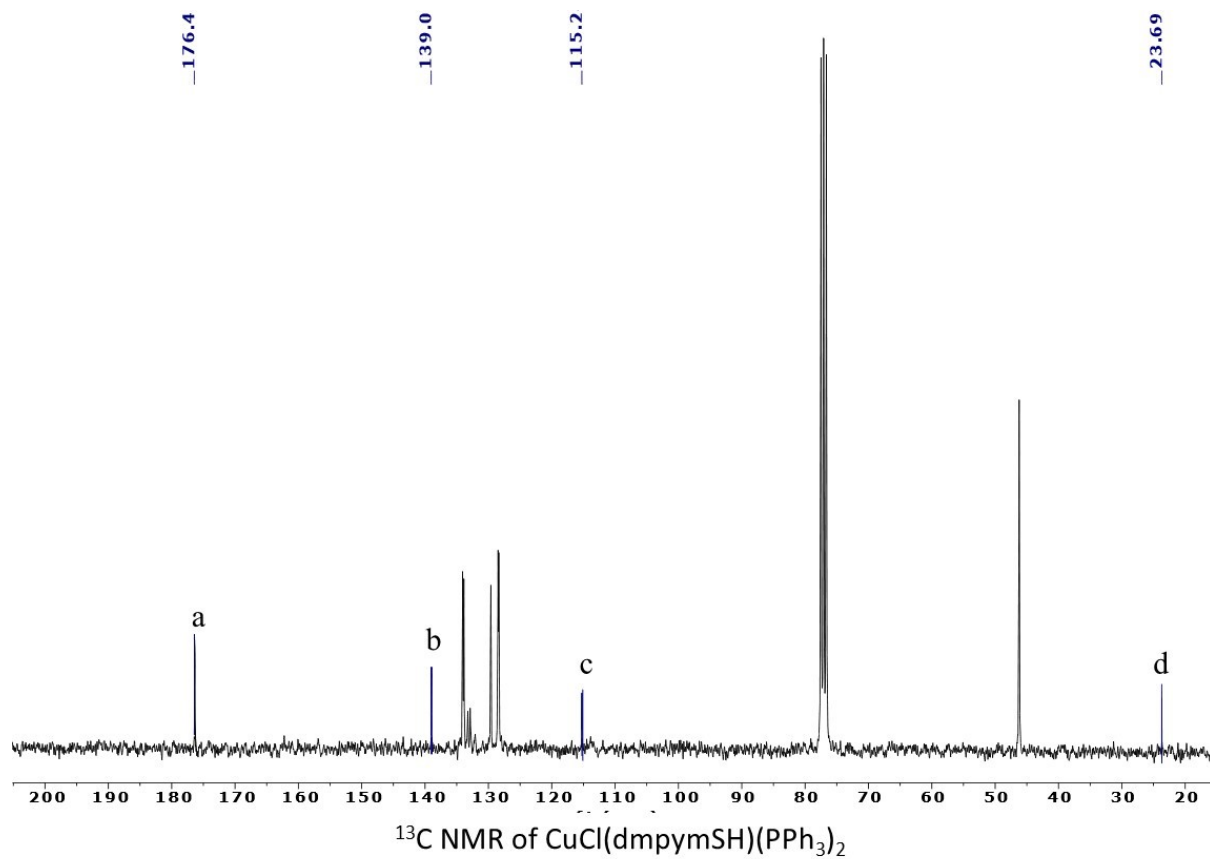

**Fig. S3.**  $^{13}\text{C}\{^1\text{H}\}$  NMR spectra of  $\text{CuCl}(\text{dmpymSH})(\text{PPh}_3)_2$  (**1**)

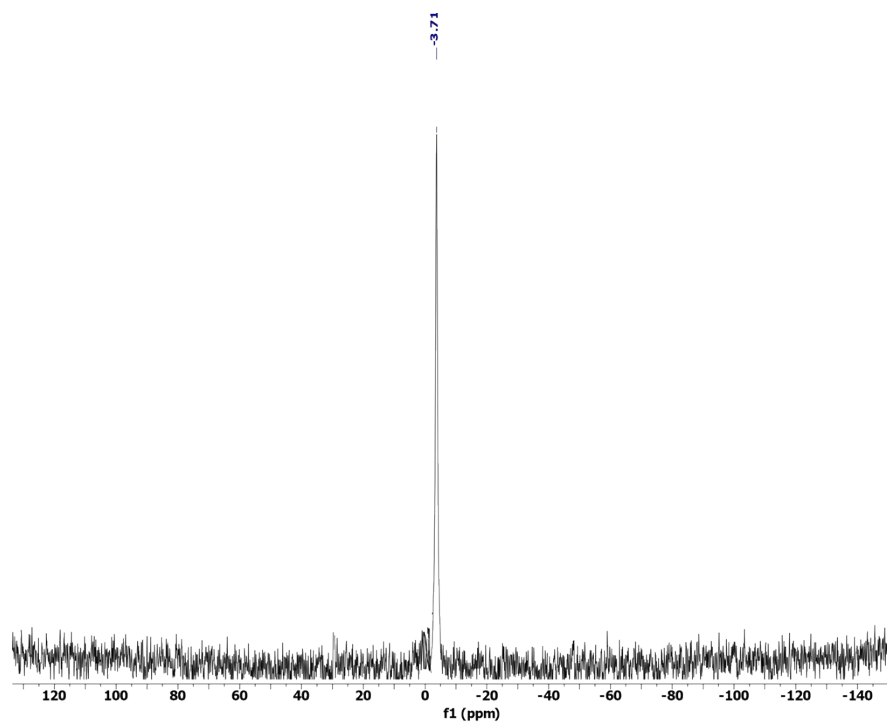

**Fig. S4.**  $^{31}\text{P}\{^1\text{H}\}$  NMR spectra of  $\text{CuCl}(\text{dmpymSH})(\text{PPh}_3)_2$  (**1**)

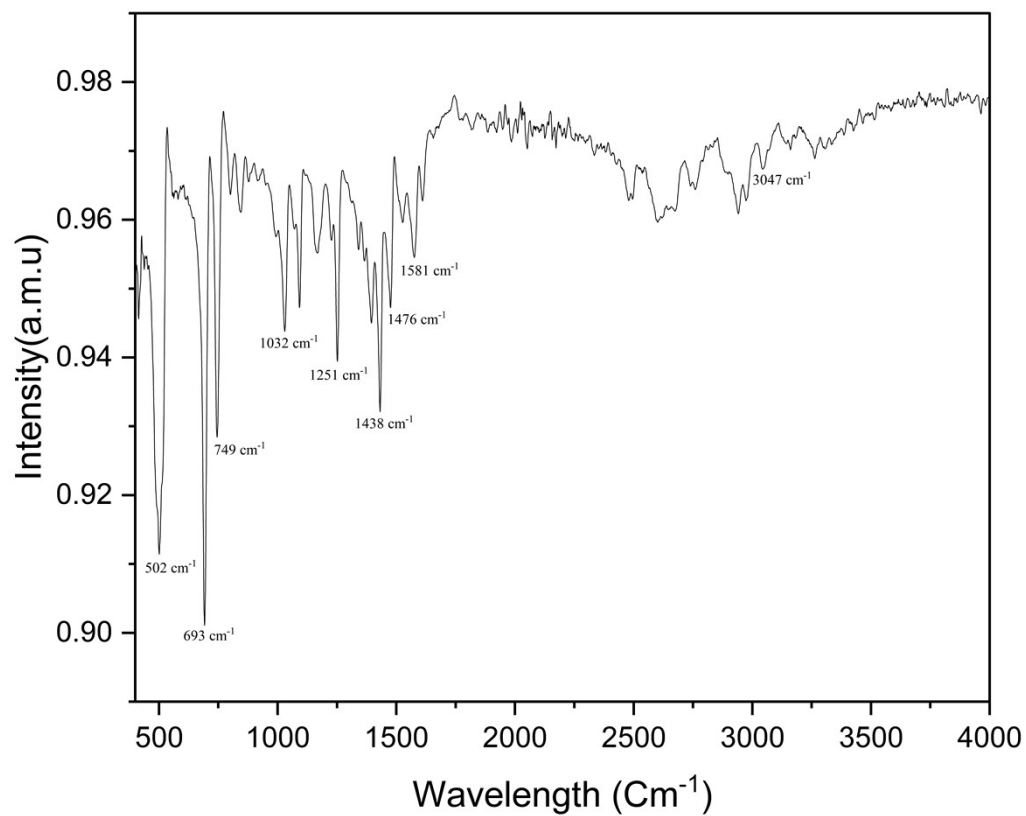

Fig. S5. IR spectra of  $\text{CuI}(\text{dmpymSH})(\text{PPh}_3)_2$  (**2**)

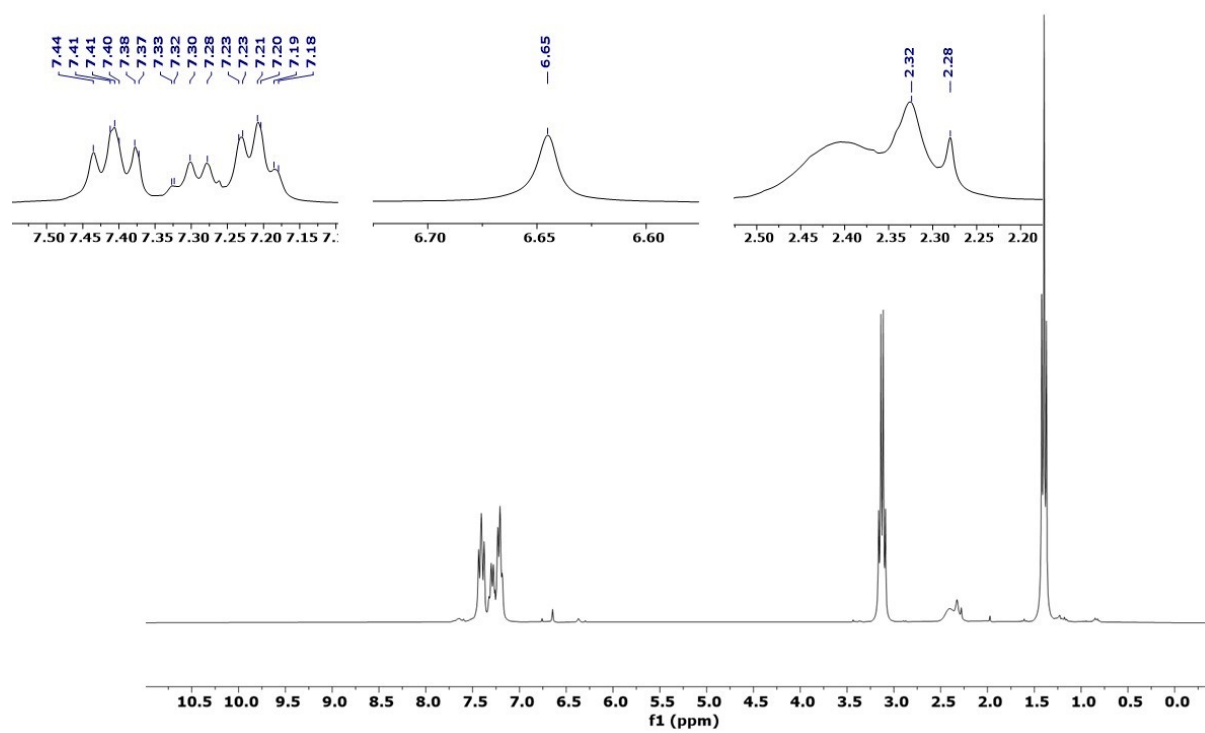

$^1\text{H}$  NMR of  $[\text{CuI}(\text{dmpymSH})(\text{PPh}_3)_2]$

Fig. S6.  $^1\text{H}$  NMR spectra of  $\text{CuI}(\text{dmpymSH})(\text{PPh}_3)_2$  (**2**)

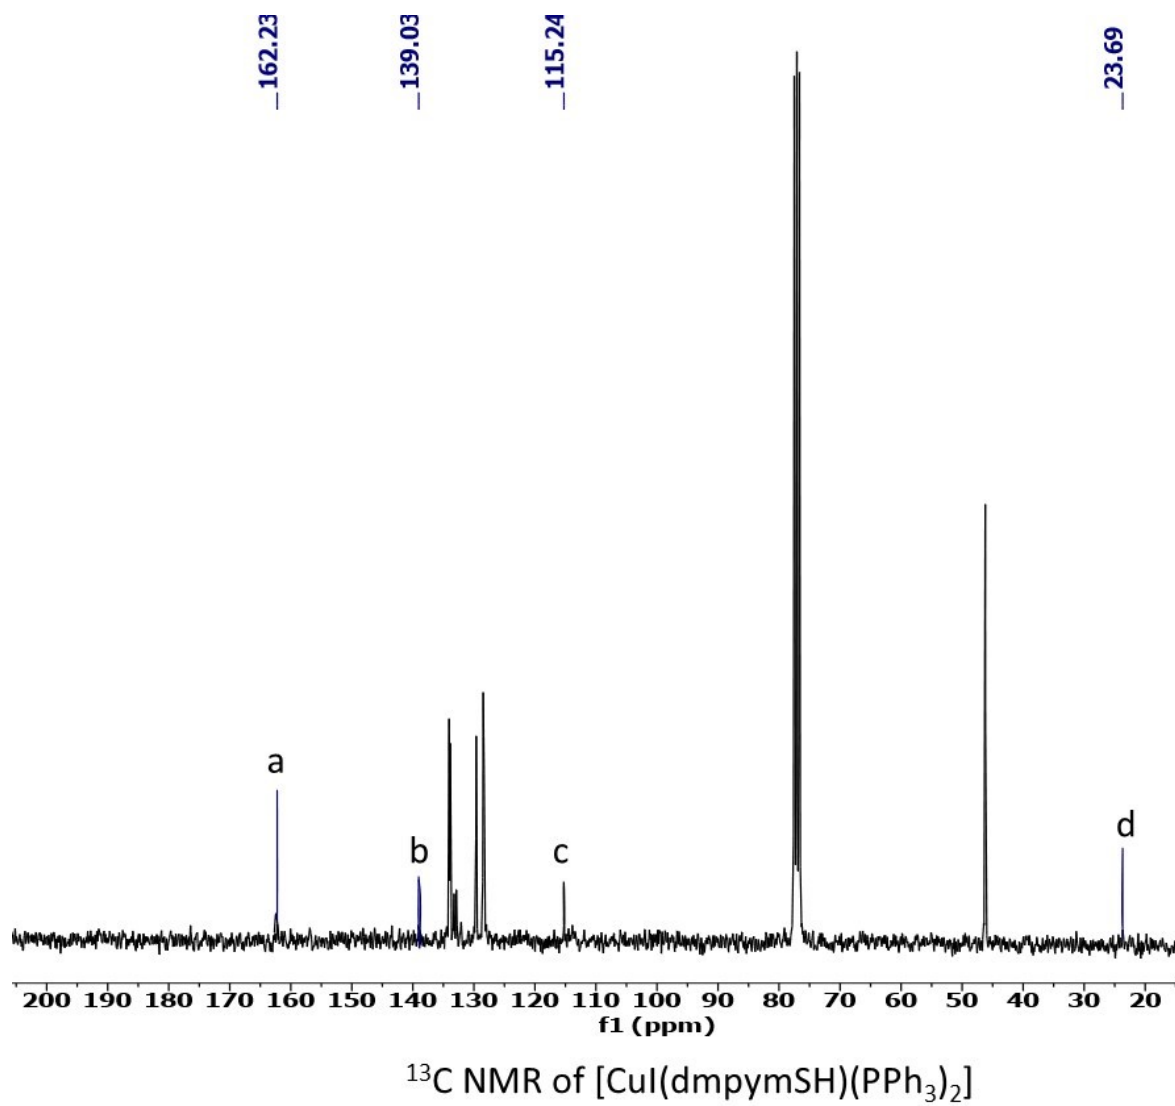

Fig. S7.  $^{13}\text{C}\{^1\text{H}\}$  NMR spectra of  $\text{CuI}(\text{dmpymSH})(\text{PPh}_3)_2$  (**2**)

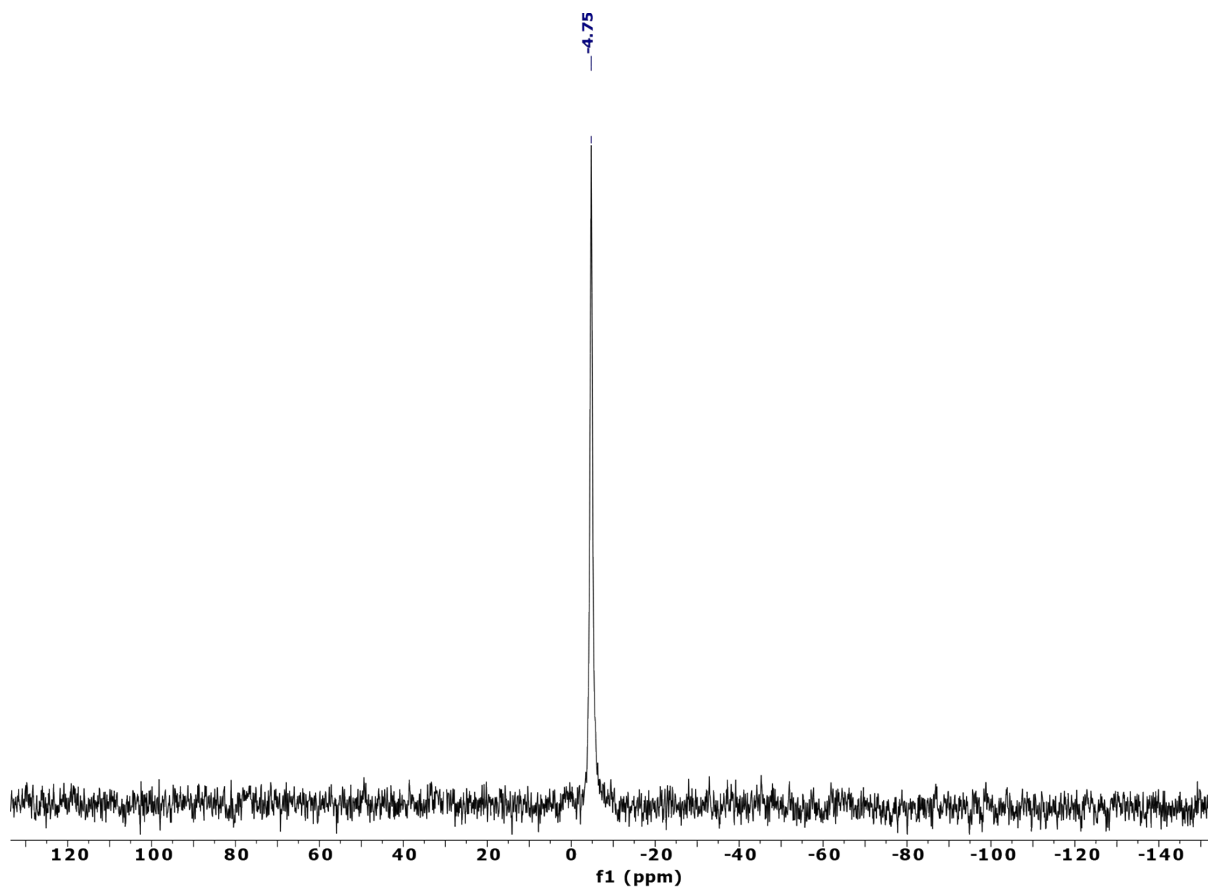

**Fig. S8.**  $^{31}\text{P}\{^1\text{H}\}$  NMR spectra of  $\text{CuI}(\text{dmpymSH})(\text{PPh}_3)_2$  (**2**)

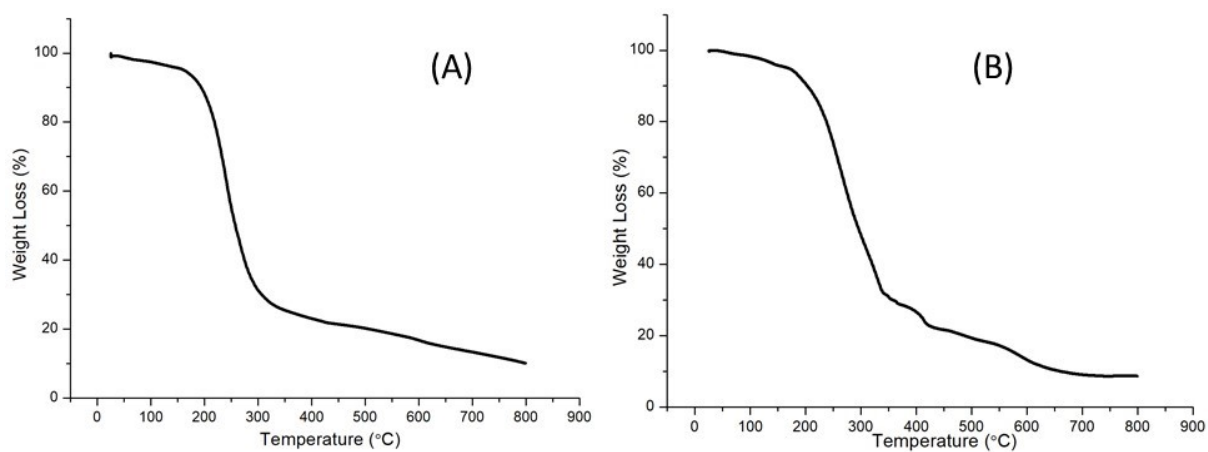

**Fig. S9.** TG analysis of (a)  $\text{CuCl}(\text{dmpymSH})(\text{PPh}_3)_2$  (**1**) and (b)  $\text{CuI}(\text{dmpymSH})(\text{PPh}_3)_2$  (**2**).

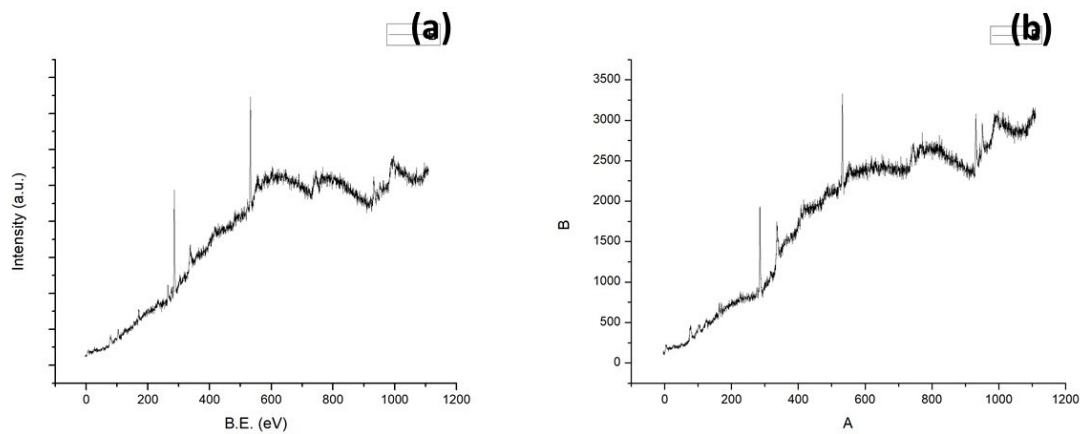

**Fig. S10.** XPS survey spectra respectively for (a, b)  $\text{Cu}_9\text{S}_5$  and (c, d)  $\text{Cu}_{31}\text{S}_{16}$  nanostructures.

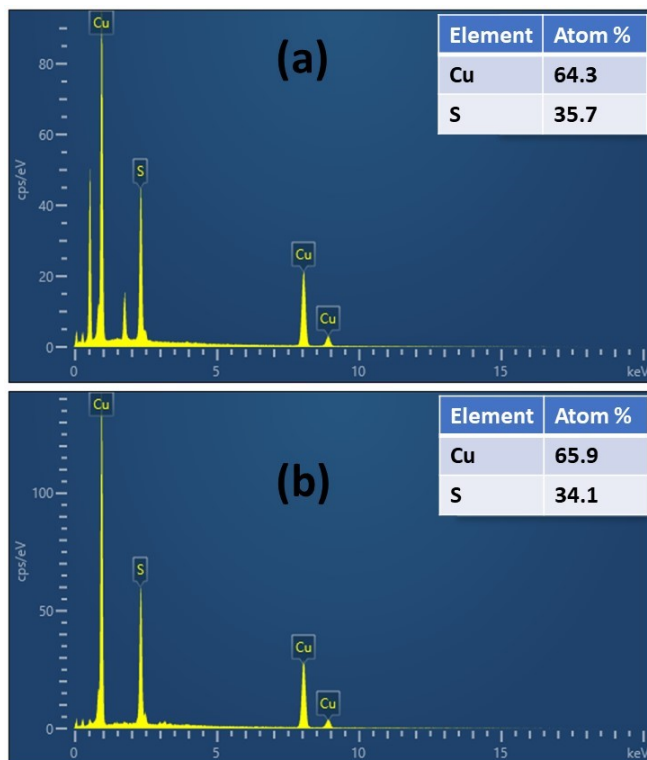

**Fig. S11.** EDS spectra of (a)  $\text{Cu}_9\text{S}_5$  and (b)  $\text{Cu}_{31}\text{S}_{16}$  nanoparticles respectively.

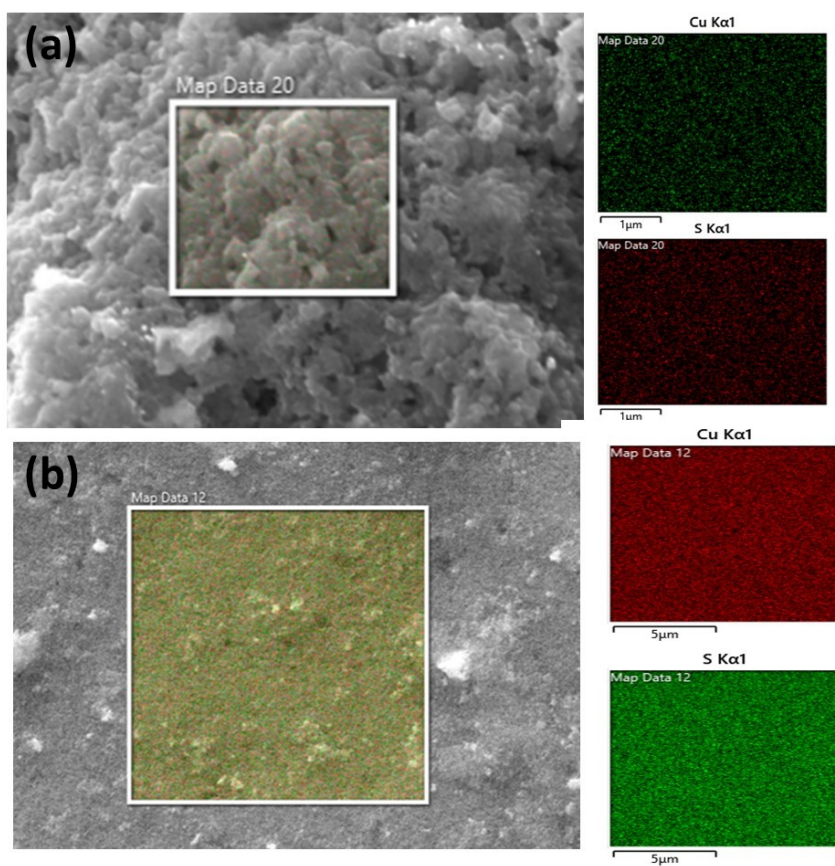

**Fig. S12.** 2D elemental mapping of (a)  $\text{Cu}_9\text{S}_5$  and (b)  $\text{Cu}_{31}\text{S}_{16}$  nanoparticles respectively.
